# Supplementary material
Source: PubMed Central journal article supplement (PMC5028898)
Supplement: NIHMS810186-supplement-Supp_info.pdf [file NIHMS810186-supplement-Supp_info.pdf]

**An orphaned Mce-associated membrane protein of *Mycobacterium tuberculosis* is a  
virulence factor that stabilizes Mce transporters**

Ellen Foot Perkowski<sup>1</sup>, Brittany K. Miller<sup>1</sup>, Jessica R. McCann<sup>1\*</sup>, Jonathan Tabb Sullivan<sup>1^</sup>,  
Seidu Malik<sup>1</sup>, Irving Coy Allen<sup>2</sup>, Virginia Godfrey<sup>3</sup>, Jennifer D. Hayden<sup>1</sup>, Miriam Braunstein<sup>1#</sup>

<sup>1</sup>Department of Microbiology and Immunology, University of North Carolina, <sup>2</sup>Department of  
Biomedical Sciences and Pathobiology, <sup>3</sup>Virginia-Maryland College of Veterinary Medicine,  
Department of Pathology and Laboratory Medicine, University of North Carolina

Present address: \*Department of Pediatrics, Duke University, ^ Integral Molecular, Philadelphia,  
Pennsylvania

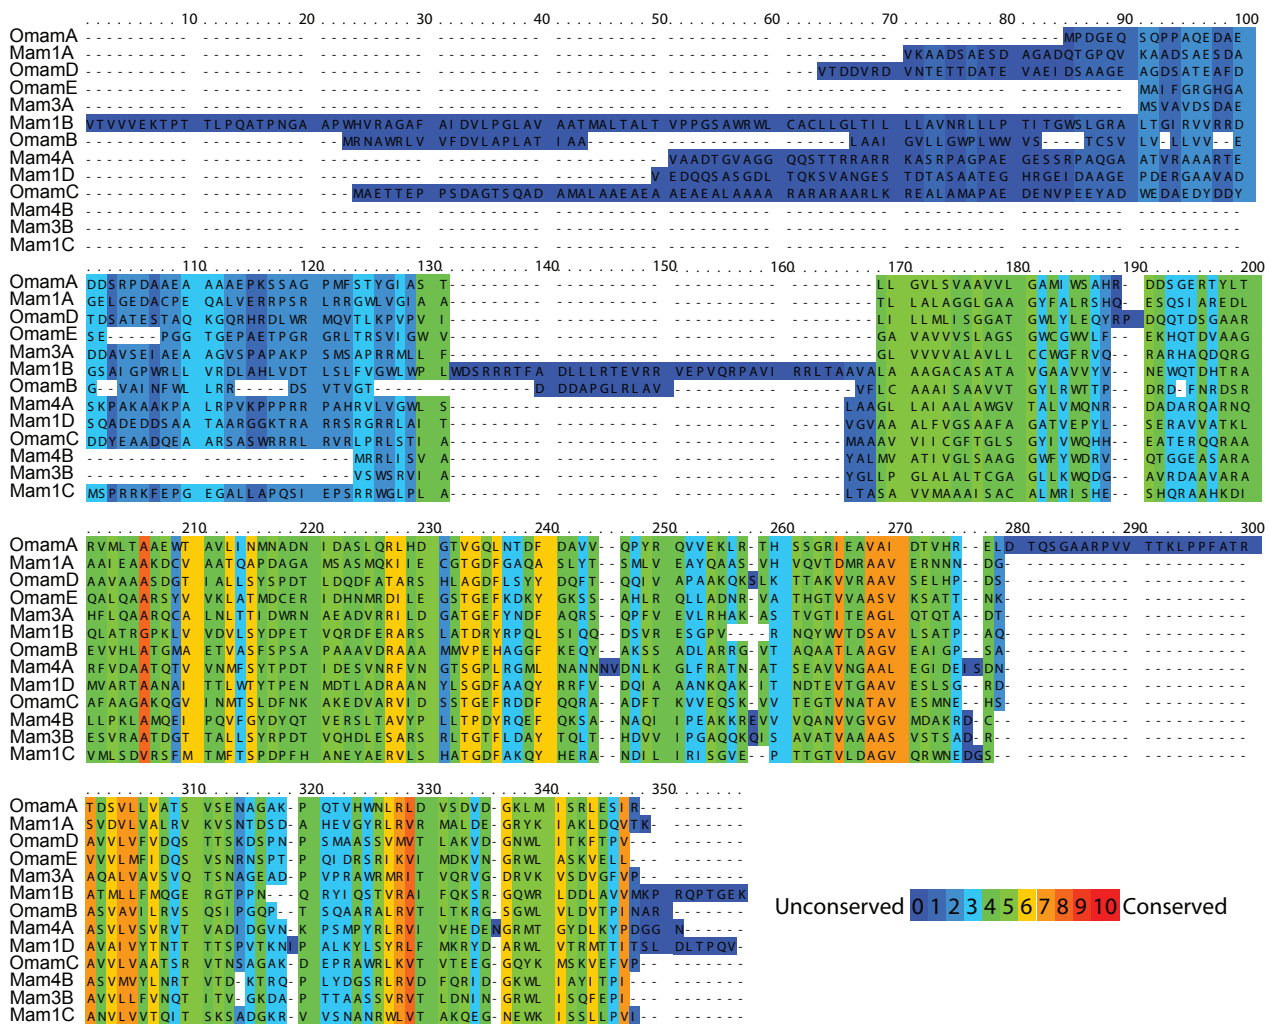

**Supplemental Figure 1.** Alignment of all Mam proteins. Alignment between all predicted *M. tuberculosis* Mam and Omam proteins in PRALINE (Bawono & Heringa, 2014). Colors represent amino acid conservation with blue representing no/low conservation and red indicating high level conservation.

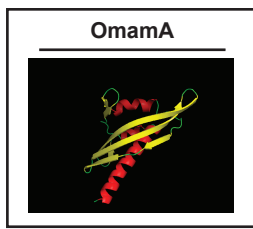

VirB8 *B. suis*      VirB8 *A. tumefaciens*      DotI *L. pneumophila*

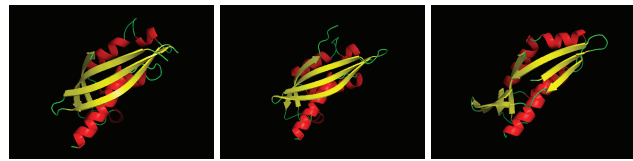

Mam1A

Mam1B

Mam1C

Mam1D

OmamB

OmamC

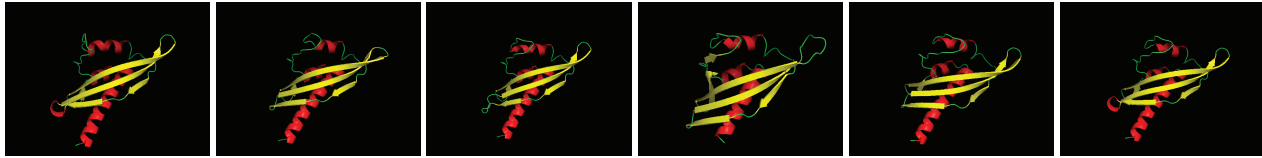

OmamD

Mam3A

Mam3B

OmamE

Mam4A

Mam4B

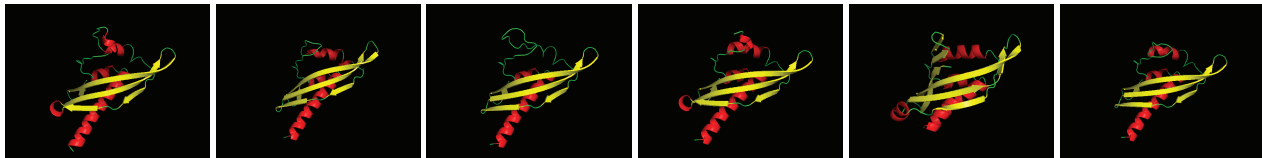

**Supplemental Figure 2.** Phyre 2, an online structural prediction program, predicts with high confidence that all Mam and Omam proteins form a NTF2-like fold. Ribbon diagrams shown represent Phyre 2 (Kelley & Sternberg, 2009) predicted structures of OmamA, Mam and Omam proteins colored by secondary structure in Pymol. Ribbon diagrams representing the solved crystal structures of VirB8 from *Brucella suis* and *Agrobacterium tumefaciens* and DotI from *Legionella pneumophila* are shown for comparison (Smith *et al.*, 2012; Bailey *et al.*, 2006; Terradot *et al.*, 2005; Kuroda *et al.*, 2015). Alpha helices are colored in red, Beta-strands in yellow, and turns in green.

## A. *Mycobacterium smegmatis*

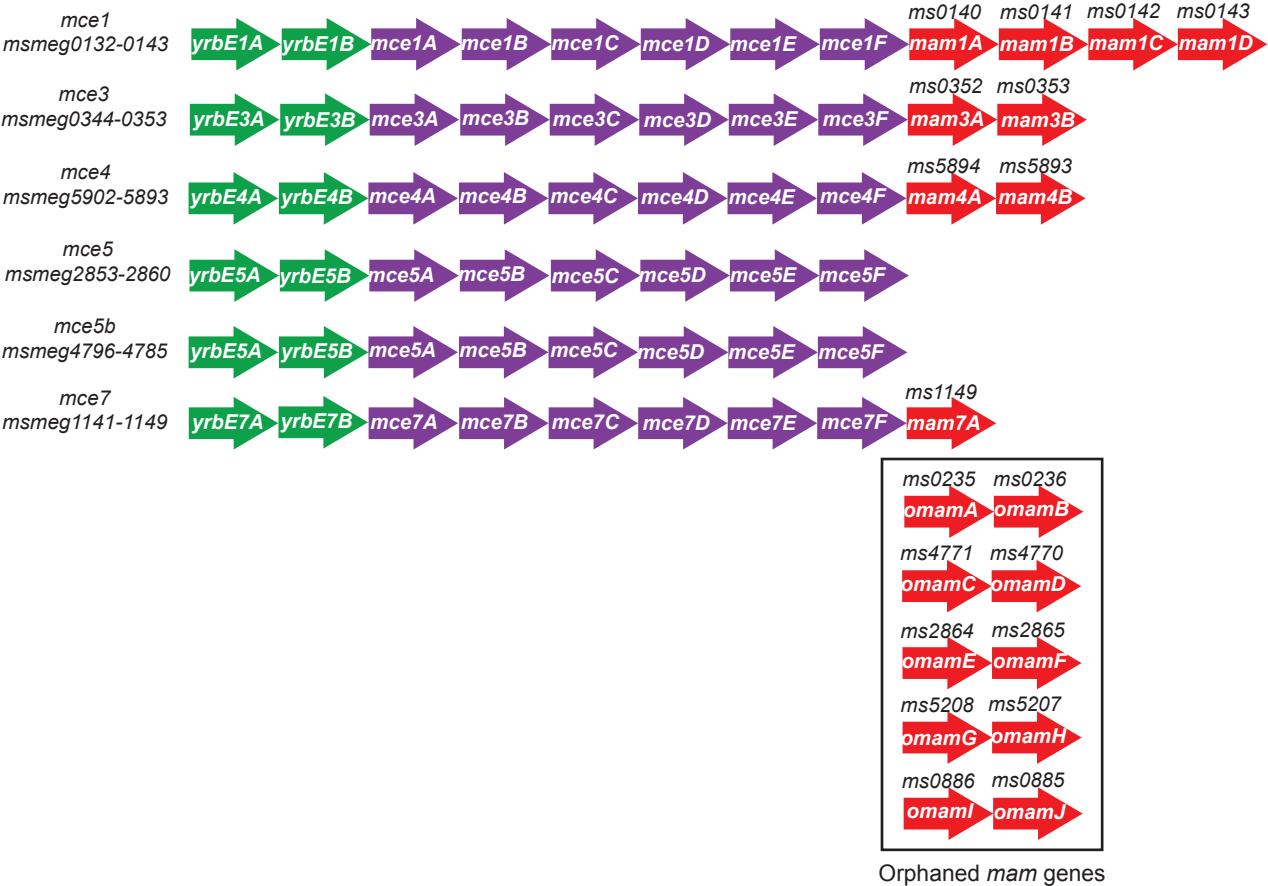

## B. *Mycobacterium leprae*

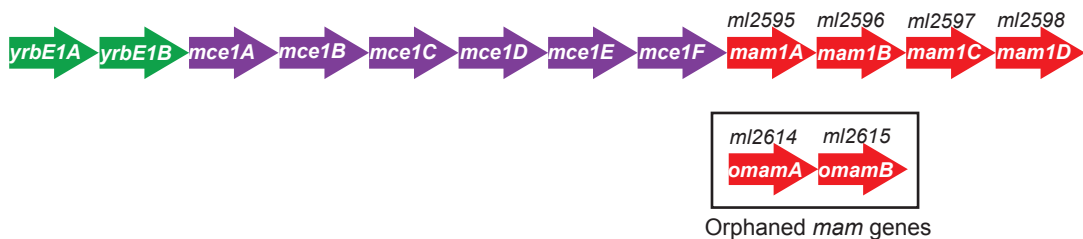

**Supplemental Figure 3. A.** *M. smegmatis* has six *mce* operons organized as shown. *Mce* operons are organized by two *yrbE* genes upstream (green), six *mce* genes (purple) and many have *mam* genes (red) downstream. Several genes, including *msmeg0235*, are predicted to encode Mam proteins but are not located in *mce* operons and thus are labeled *orphaned mce-associated membrane genes (omam)* (Casali & Riley, 2007). **B.** The *mce* operon structure in *Mycobacterium leprae* which only contains one *mce* operon and two *orphaned mam* genes (Casali & Riley, 2007).

**Supplemental Table 1. Bacterial strains used in this study**

| <b><i>M. tuberculosis</i> strains</b> | <b>Description</b>                                                                                                                                             | <b>Source</b>       |
|---------------------------------------|----------------------------------------------------------------------------------------------------------------------------------------------------------------|---------------------|
| PM638                                 | <i>M. tuberculosis</i> H37Rv $\Delta$ <i>blaC</i>                                                                                                              | Flores et al., 2005 |
| MBTB126                               | PM638 carrying integrating vector pJES137 (expressing ' <i>blaTEM-1</i> '). Strain is <i>hyg</i> <sup>R</sup>                                                  | McCann et al., 2011 |
| MBTB156                               | PM638, <i>mce2F::tn</i> (with a ' <i>blaTEM-1</i> ' transposon inserted into <i>mce2F</i> at amino acid position 476). Strain is <i>hyg</i> <sup>R</sup>       | McCann et al., 2011 |
| MBTB178                               | MBTB126 + pMV261.kan. Strain is <i>hyg</i> <sup>R</sup> and <i>kan</i> <sup>R</sup>                                                                            | McCann et al., 2011 |
| MBTB183                               | PM638, <i>omamA(rv0199)::tn</i> (with a ' <i>blaTEM-1</i> ' transposon inserted in <i>rv0199</i> at amino acid position 74). Strain is <i>hyg</i> <sup>R</sup> | McCann et al., 2011 |
| MBTB204                               | PM638, <i>mce1A::tn</i> (with a ' <i>blaTEM-1</i> ' transposon inserted in <i>mce1A</i> at amino acid position 449). Strain is <i>hyg</i> <sup>R</sup>         | McCann et al., 2011 |
| MBTB288                               | PM638, <i>mce4F::tn</i> (with a ' <i>blaTEM-1</i> ' transposon inserted in <i>mce4F</i> at amino acid position 539). Strain is <i>hyg</i> <sup>R</sup>         | McCann et al., 2011 |
| MBTB319                               | MBTB183 + pMV261. Strain is <i>hyg</i> <sup>R</sup> and <i>kan</i> <sup>R</sup>                                                                                | McCann et al., 2011 |
| MBTB320                               | MBTB183 + pJES178 (expressing <i>omamA<sub>mtb</sub></i> ). Strain is <i>hyg</i> <sup>R</sup> and <i>kan</i> <sup>R</sup>                                      | McCann et al., 2011 |
| MBTB329                               | PM638, <i>mce4B::tn</i> (with a ' <i>blaTEM-1</i> ' transposon inserted in <i>mce4B</i> at amino acid position 350). Strain is <i>hyg</i> <sup>R</sup>         | McCann et al., 2011 |

| <b><i>M. smegmatis</i> strains</b> | <b>Description</b>                                                                                                                      | <b>Source</b>        |
|------------------------------------|-----------------------------------------------------------------------------------------------------------------------------------------|----------------------|
| mc <sup>2</sup> 155                | <i>M. smegmatis</i> wild-type (WT)                                                                                                      | Snapper et. al, 1990 |
| $\Delta$ <i>mce4</i> mutant        | $\Delta$ <i>mce4</i>                                                                                                                    | Klepp et al., 2012   |
| $\Delta$ <i>mce6X</i> mutant       | $\Delta$ <i>mce1</i> , $\Delta$ <i>mce2</i> , $\Delta$ <i>mce3</i> , $\Delta$ <i>mce4</i> , $\Delta$ <i>mce5</i> , $\Delta$ <i>mce6</i> | Klepp et al., 2012   |
| EP1178                             | $\Delta$ <i>omamA</i> , $\Delta$ <i>mce4</i>                                                                                            | This study           |
| EP1179                             | $\Delta$ <i>omamA</i>                                                                                                                   | This study           |
| EP1180                             | $\Delta$ <i>omamA</i> , $\Delta$ <i>mce6X</i>                                                                                           | This study           |
| EP1182                             | mc <sup>2</sup> 155 + pMV261. Strain is <i>kan</i> <sup>R</sup>                                                                         | This study           |
| EP1193                             | EP1179 + pMV261. Strain is <i>kan</i> <sup>R</sup>                                                                                      | This study           |
| EP1194                             | EP1179 + pEP139 (expressing <i>omamA<sub>ms</sub></i> ). Strain is <i>kan</i> <sup>R</sup>                                              | This study           |
| EP1195                             | EP1179 + pEP166 (expressing <i>omamA<sub>mtb</sub></i> HA). Strain is <i>kan</i> <sup>R</sup>                                           | This study           |
| EP1203                             | EP1179 + pJES178 (expressing <i>omamA<sub>mtb</sub></i> ). Strain is <i>kan</i> <sup>R</sup>                                            | This study           |
| EP1204                             | $\Delta$ <i>mce4</i> + pMV261. Strain is <i>kan</i> <sup>R</sup>                                                                        | This study           |
| EP1206                             | EP1178 + pMV261. Strain is <i>kan</i> <sup>R</sup>                                                                                      | This study           |
| EP1208                             | $\Delta$ <i>mce6X</i> + pMV261. Strain is <i>kan</i> <sup>R</sup>                                                                       | This study           |
| EP1210                             | EP1180 + pMV261. Strain is <i>kan</i> <sup>R</sup>                                                                                      | This study           |

**Supplemental Table 2. Plasmids used in this study**

| Plasmid | Antibiotic resistance | Notes                                                                                                    | Source                                                 |
|---------|-----------------------|----------------------------------------------------------------------------------------------------------|--------------------------------------------------------|
| pMV261  | kan                   | Multicopy mycobacterial vector with <i>hsp60</i> promoter                                                | Stover et al., 1991                                    |
| pJSC77  | kan                   | Multicopy mycobacterial vector, HA tag cloned into pMV261                                                | Glickman et al., 2000                                  |
| pJV53   | kan                   | Multicopy vector for recombineering, phage recombinase genes expressed from acetamide inducible promoter | van Kessel & Hatfull, 2008; van Kessel & Hatfull, 2007 |
| pMP614  | hyg                   | <i>res-hyg-res</i> vector for constructing recombineering vectors                                        | Kind gift from Martin Pavelka                          |
| pMP854  | kan                   | Resolvase plasmid to remove <i>hyg</i> resistance marker                                                 | Kind gift from Martin Pavelka                          |
| pJES137 | hyg                   | Integrating mycobacterial vector with constitutively expressed <i>blaTEM-1</i>                           | McCann et al., 2011                                    |
| pJES178 | kan                   | P <sub><i>hsp60</i></sub> - <i>omama</i> <sub><i>mtb</i></sub> cloned into pMV261                        | McCann et al., 2011                                    |
| pEP139  | kan                   | P <sub><i>hsp60</i></sub> - <i>omama</i> <sub><i>ms</i></sub> cloned into pMV261                         | This study                                             |
| pEP166  | kan                   | P <sub><i>hsp60</i></sub> - <i>omama</i> <sub><i>mtb</i></sub> cloned into pJSC77                        | This study                                             |

**Supplemental Table 3. Primers used in this study**

| <b>Gene</b>      | <b>Forward primer</b>             | <b>Reverse primer</b>              |
|------------------|-----------------------------------|------------------------------------|
| <i>sigA</i>      | GAGATCGGCCAGGTCTACGGCGTG          | CTGACATGGGGGCCCGCTACGTTG           |
| <i>mce1A</i>     | GTCTTCGCGCTCGTAGTTG               | ACGTGTGACCTCCGAGATG                |
| <i>mce1F</i>     | TCGTCTCCGTAGTCGCAATC              | ACATTGGCCGTCGGATACAG               |
| <i>mce4A</i>     | ATCCGCAGTGCTGACTTATC              | TGCCACGGTATTTGACCTTG               |
| <i>mce4F</i>     | ATCACCGTCATCACCTGAG               | CGTTGGCGTTCTTGACAGG                |
| <i>msmeg0235</i> | GAGAATTCCATGCCTGACGCGCCAGCAAG     | AGGAATTCGGTTCCTCATCGGATGGGCTCCAGAC |
| <i>rv0199HA</i>  | AAGCTTGTCGAATCGACTCCAACCGGGAGATCA | TTGGCCATGCCTGACGGGGAGCAGAGC        |

## References

- Bailey, S., D. Ward, R. Middleton, J.G. Grossmann & P.C. Zambryski, (2006) *Agrobacterium tumefaciens* VirB8 structure reveals potential protein-protein interaction sites. *Proc Natl Acad Sci U S A* **103**: 2582-2587.
- Bawono, P. & J. Heringa, (2014) PRALINE: a versatile multiple sequence alignment toolkit. *Methods Mol Biol* **1079**: 245-262.
- Casali, N. & L.W. Riley, (2007) A phylogenomic analysis of the Actinomycetales *mce* operons. *BMC Genomics* **8**: 60.
- Flores, A.R., L.M. Parsons & M.S. Pavelka, Jr., (2005) Genetic analysis of the beta-lactamases of *Mycobacterium tuberculosis* and *Mycobacterium smegmatis* and susceptibility to beta-lactam antibiotics. *Microbiology* **151**: 521-532.
- Glickman, M.S., J.S. Cox & W.R. Jacobs, Jr., (2000) A novel mycolic acid cyclopropane synthetase is required for cording, persistence, and virulence of *Mycobacterium tuberculosis*. *Mol Cell* **5**: 717-727.
- Kelley, L.A. & M.J. Sternberg, (2009) Protein structure prediction on the Web: a case study using the Phyre server. *Nat Protoc* **4**: 363-371.
- Klepp, L.I., M.A. Forrellad, A.V. Osella, F.C. Blanco, E.J. Stella, M.V. Bianco, L. Santangelo Mde, C. Sassetti, M. Jackson, A.A. Cataldi, F. Bigi & H.R. Morbidoni, (2012) Impact of the deletion of the six *mce* operons in *Mycobacterium smegmatis*. *Microbes Infect* **14**: 590-599.
- Kuroda, T., T. Kubori, X. Thanh Bui, A. Hyakutake, Y. Uchida, K. Imada & H. Nagai, (2015) Molecular and structural analysis of *Legionella* DotI gives insights into an inner membrane complex essential for type IV secretion. *Scientific reports* **5**: 10912.
- McCann, J.R., J.A. McDonough, J.T. Sullivan, M.E. Feltcher & M. Braunstein, (2011) Genome-wide identification of *Mycobacterium tuberculosis* exported proteins with roles in intracellular growth. *J Bacteriol* **193**: 854-861.
- Smith, M.A., M. Coincon, A. Paschos, B. Jolicoeur, P. Lavallee, J. Sygusch & C. Baron, (2012) Identification of the binding site of *Brucella* VirB8 interaction inhibitors. *Chem Biol* **19**: 1041-1048.
- Snapper, S.B., R.E. Melton, S. Mustafa, T. Kieser & W.R. Jacobs, Jr., (1990) Isolation and characterization of efficient plasmid transformation mutants of *Mycobacterium smegmatis*. *Mol Microbiol* **4**: 1911-1919.
- Stover, C.K., V.F. de la Cruz, T.R. Fuerst, J.E. Burlein, L.A. Benson, L.T. Bennett, G.P. Bansal, J.F. Young, M.H. Lee & G.F. Hatfull, (1991) New use of BCG for recombinant vaccines. *Nature* **351**: 456-460.
- Terradot, L., R. Bayliss, C. Oomen, G.A. Leonard, C. Baron & G. Waksman, (2005) Structures of two core subunits of the bacterial type IV secretion system, VirB8 from *Brucella suis* and ComB10 from *Helicobacter pylori*. *Proc Natl Acad Sci U S A* **102**: 4596-4601.
- van Kessel, J.C. & G.F. Hatfull, (2007) Recombineering in *Mycobacterium tuberculosis*. *Nature methods* **4**: 147-152.
- van Kessel, J.C. & G.F. Hatfull, (2008) Mycobacterial recombineering. *Methods Mol Biol* **435**: 203-215.
